# Supplementary material
Source: MDPI journal article supplement (https://www.mdpi.com/2073-4344/12/11/1387)
Supplement: s1 [file s1]

**Pt<sub>2</sub> dimer anchored vertically in defective BN monolayer as an efficient catalyst for N<sub>2</sub> reduction: A DFT study**

Linke Yu and Fengyu Li \*

Physical School of Science and Technology, Inner Mongolia University, Hohhot 010021, China

\* Correspondence: fengyuli@imu.edu.cn

**Table S1. The distance between metal atoms ( $D$ , in Å), the binding energies ( $E_b$ ) of metal atoms in 10 species, the cohesive energy ( $E_{coh}$ ) of bulk M (in eV), and the  $E_b - E_{coh}$  (in eV).**

| system                  | $D$  | $E_b$ | $E_{coh}$ | $E_b - E_{coh}$ |
|-------------------------|------|-------|-----------|-----------------|
| Co <sub>2</sub> ⊥ vb-BN | 2.40 | −5.49 | −5.04     | −0.45           |
| Ni <sub>2</sub> ⊥ vb-BN | 2.37 | −5.62 | −5.04     | −0.58           |
| Rh <sub>2</sub> ⊥ vb-BN | 2.78 | −5.60 | −5.93     | 0.33            |
| Ir <sub>2</sub> ⊥ vb-BN | 2.85 | −5.80 | −7.59     | 1.79            |
| Pt <sub>2</sub> ⊥ vb-BN | 2.92 | −4.53 | −5.52     | 0.99            |
| Co <sub>2</sub> ⊥ vn-BN | 2.30 | −4.30 | −5.04     | 0.74            |
| Ni <sub>2</sub> ⊥ vn-BN | 2.48 | −5.11 | −5.04     | −0.07           |
| Rh <sub>2</sub> ⊥ vn-BN | 2.76 | −5.63 | −5.93     | 0.30            |
| Ir <sub>2</sub> ⊥ vn-BN | 3.24 | −6.04 | −7.59     | 1.55            |
| Pt <sub>2</sub> ⊥ vn-BN | 2.99 | −6.31 | −5.52     | −0.79           |

**Table S2.** The Bader charge ( $Q$ , in  $|e|$ ) on the M atoms, the magnetic order ( $MO$ ) and the magnetic moment on M atoms ( $M$ , in  $\mu_B$ ) of the stable catalyst structures.

| system                 | $Q$ (M/M')  | $MO$ | $M$ (M <sub>1</sub> /M <sub>2</sub> ) |
|------------------------|-------------|------|---------------------------------------|
| Co <sub>2</sub> ⊥vb-BN | +0.84/+0.84 | AFM  | 1.97/−1.14                            |
| Ni <sub>2</sub> ⊥vb-BN | +0.76/+0.76 | FM   | 0.40/0.40                             |
| Rh <sub>2</sub> ⊥vb-BN | +0.50/+0.50 | FM   | 0.36/0.36                             |
| Pt <sub>2</sub> ⊥vb-BN | +0.44/+0.44 | FM   | 0.26/0.26                             |
| Co <sub>2</sub> ⊥vn-BN | +0.15/+0.15 | FM   | 0.61/0.61                             |
| Ni <sub>2</sub> ⊥vn-BN | −0.05/−0.05 | NM   | 0.00/0.00                             |
| Rh <sub>2</sub> ⊥vn-BN | −0.25/−0.25 | FM   | 0.45/0.45                             |
| Pt <sub>2</sub> ⊥vn-BN | −0.48/−0.48 | FM   | 0.14/0.14                             |

**Table S3.** The adsorption energy ( $E_{ad}$ , in eV), the charge transferred from the stable DACs to the adsorbed N<sub>2</sub> ( $\Delta Q$ , in  $|e|$ ), the shortest distance between the N<sub>2</sub> and M ( $d$ , in Å), the distance between the N atom and N atom in N<sub>2</sub> ( $d_{N-N}$ , in Å) of the N<sub>2</sub> molecule adsorbed on the stable catalyst structures.

| system                 | $E_{ad}$ | $\Delta Q$ | $d$       | $d_{N-N}$ |
|------------------------|----------|------------|-----------|-----------|
| Co <sub>2</sub> ⊥vb-BN | −1.26    | −0.43      | 1.92/2.00 | 1.17      |
| Rh <sub>2</sub> ⊥vb-BN | −0.89    | −0.35      | 2.07/2.23 | 1.16      |
| Pt <sub>2</sub> ⊥vb-BN | −1.11    | −0.35      | 2.11/2.11 | 1.17      |
| Rh <sub>2</sub> ⊥vn-BN | −1.26    | −0.30      | 2.13/2.22 | 1.15      |

**Table S4.** The  $E_{zpe} - TS$  of the free gas molecules.

| $E_{zpe} - TS$ (eV)  |       |
|----------------------|-------|
| NH <sub>3</sub>      | 0.42  |
| H <sub>2</sub> O (l) | 0.00  |
| H <sub>2</sub>       | -0.05 |
| N <sub>2</sub>       | -0.35 |

**Table S5.** Free energy correction ( $E_{zpe} - TS$ ) (in eV) for each adsorbed species in the NRR reaction path on Co<sub>2</sub>  $\perp$  vb-BN, Rh<sub>2</sub>  $\perp$  vb-BN, Pt<sub>2</sub>  $\perp$  vb-BN and Rh<sub>2</sub>  $\perp$  vn-BN.

|                               |                 |      |       |                    |                                  |                                     |                  |
|-------------------------------|-----------------|------|-------|--------------------|----------------------------------|-------------------------------------|------------------|
|                               | *N <sub>2</sub> | *NNH | *NHNH | *NHNH <sub>2</sub> | *NH <sub>2</sub> NH <sub>2</sub> | *NH <sub>2</sub> ...NH <sub>3</sub> | *NH <sub>3</sub> |
| Co <sub>2</sub> $\perp$ vb-BN | 0.09            | 0.36 | 0.69  | 1.04               | 1.33                             | 1.42                                | 0.96             |
|                               | *N <sub>2</sub> | *NNH | *NHNH | *NHNH <sub>2</sub> | *NH <sub>2</sub> NH <sub>2</sub> | *NH <sub>2</sub> ...NH <sub>3</sub> | *NH <sub>3</sub> |
| Rh <sub>2</sub> $\perp$ vb-BN | 0.09            | 0.35 | 0.72  | 1.07               | 1.34                             | 1.47                                | 0.94             |
|                               | *N <sub>2</sub> | *NNH | *NHNH | *NHNH <sub>2</sub> | *NH <sub>2</sub> NH <sub>2</sub> | *NH <sub>2</sub> ...NH <sub>3</sub> | *NH <sub>3</sub> |
| Pt <sub>2</sub> $\perp$ vb-BN | 0.09            | 0.41 | 0.72  | 1.10               | 1.42                             | 1.48                                | 0.97             |
|                               | *N <sub>2</sub> | *NNH | *NHNH | *NHNH <sub>2</sub> | *NH <sub>2</sub> NH <sub>2</sub> | *NH <sub>2</sub> ...NH <sub>3</sub> | *NH <sub>3</sub> |
| Rh <sub>2</sub> $\perp$ vn-BN | 0.09            | 0.40 | 0.69  | 1.09               | 1.37                             | 1.42                                | 0.96             |

**Table S6. The potential-determining steps, and limiting potentials ( $U_L$ ) for the NRR on the stable catalyst structures.**

| System                 | Potential-determining step                            | $U_L$ (in V) |
|------------------------|-------------------------------------------------------|--------------|
| Co <sub>2</sub> ▯vb-BN | *NHNH <sub>2</sub> → *NH <sub>2</sub> NH <sub>2</sub> | −0.69        |
| Rh <sub>2</sub> ▯vb-BN | *NN → *NNH                                            | −0.50        |
| Pt <sub>2</sub> ▯vb-BN | *NN → *NNH                                            | −0.06        |
| Rh <sub>2</sub> ▯vn-BN | *NN → *NNH                                            | −0.49        |
| Rh@vb-BN               | *NN → *NNH                                            | −1.25        |
| Pt@vb-BN               | *NN → *NNH                                            | −0.35        |
| Rh@vn-BN               | *NN → *NNH                                            | −1.48        |

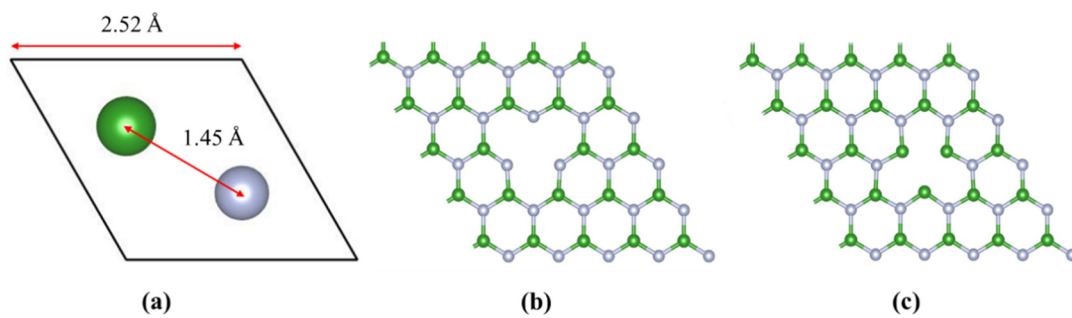

**Figure S1.** Structural diagram of the single-cell structure of (a) *h*-BN, (b) vb-BN and (c) vn-BN model. Colour scheme: B, green and N, silver.

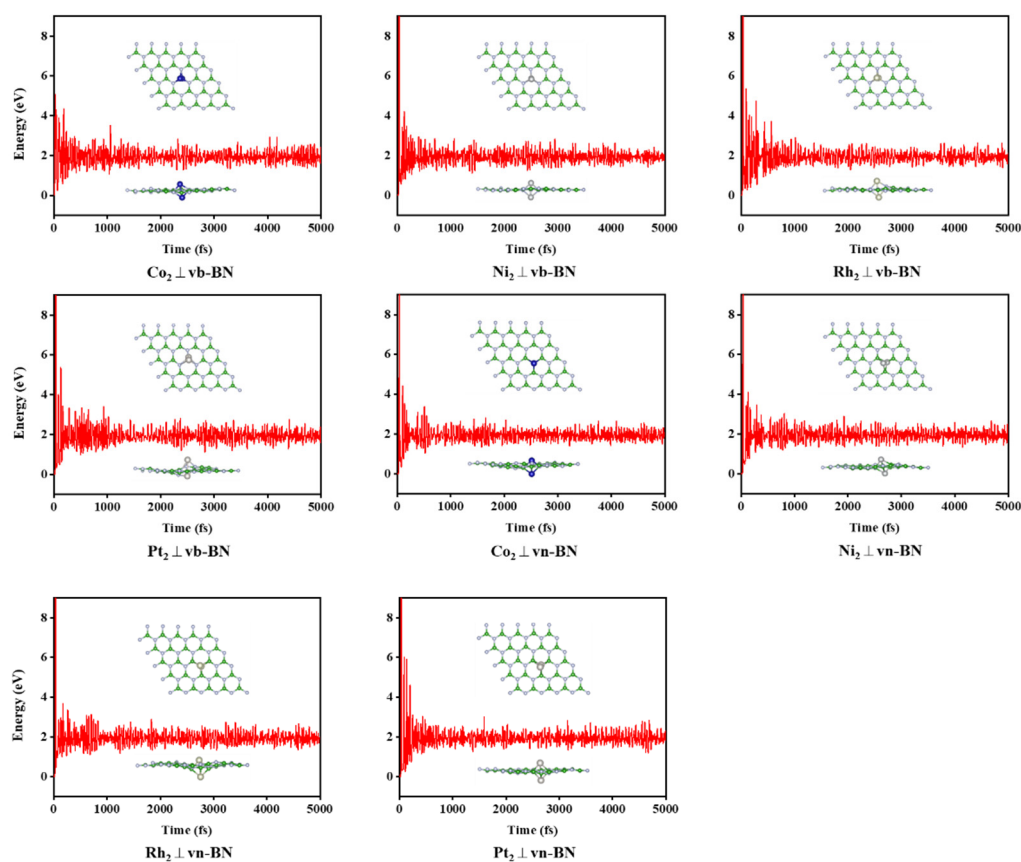

**Figure S2.** The energy evolution of 8 catalysts during 5 ps FPMD simulations at 300 K, the insets are the final annealed structures.

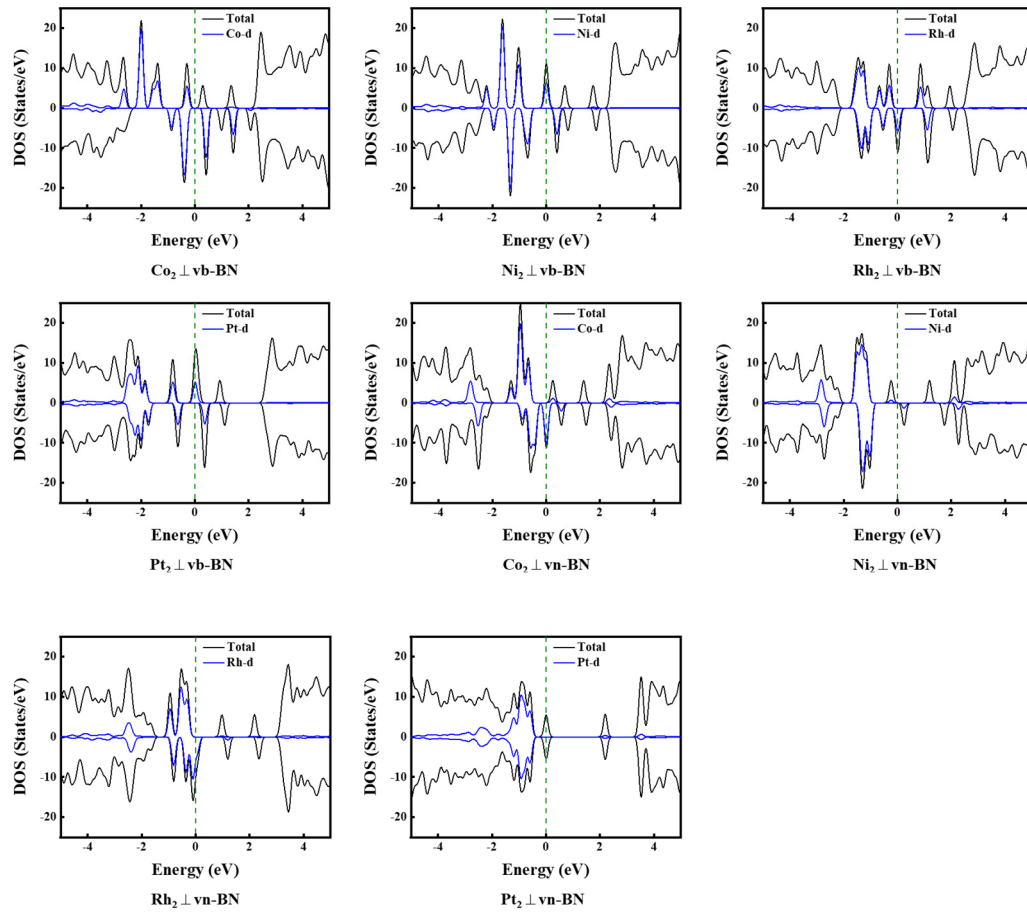

**Figure S3.** Density of states (DOS) of 8 DACs. The green dashed lines indicate the Fermi energy level.

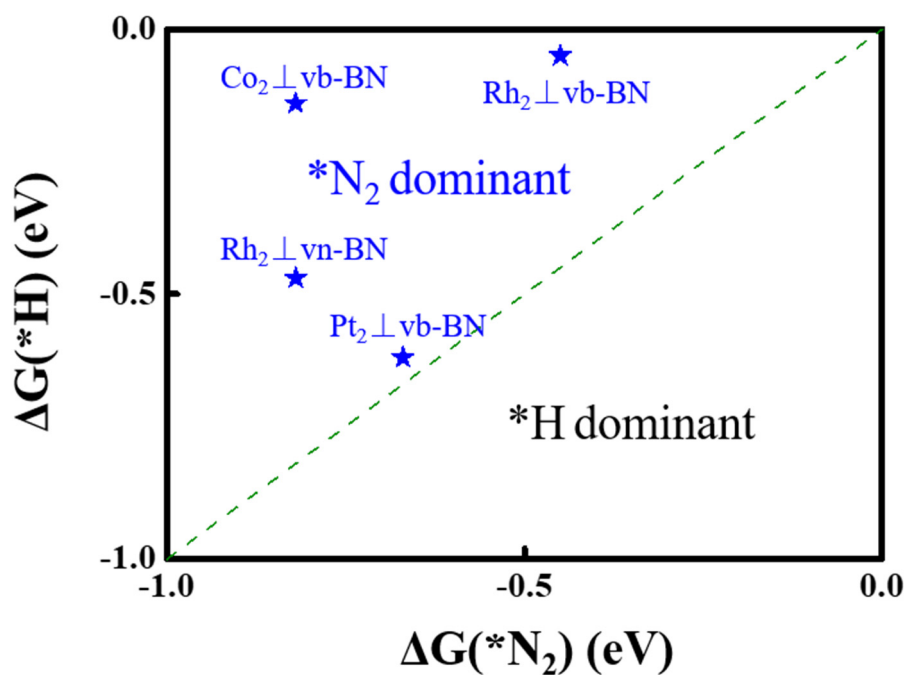

**Figure S4.** Calculated  $\Delta G(*N_2)$  and  $\Delta G(*H)$  on 4 DACs.

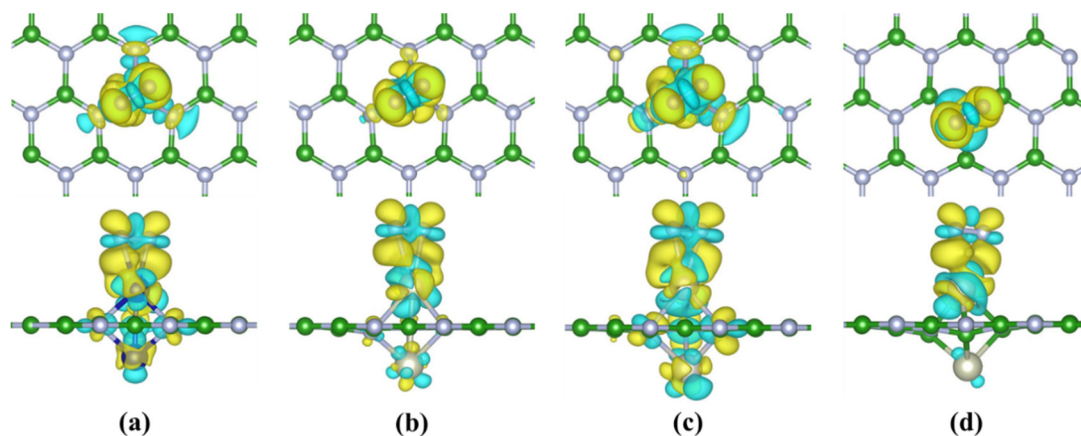

**Figure S5.** Differential charge diagram of  $N_2$ -adsorbed on (a)  $Co_2 \perp vb-BN$ , (b)  $Rh_2 \perp vb-BN$ , (c)  $Pt_2 \perp vb-BN$  and (d)  $Rh_2 \perp vn-BN$ . Yellow is positively charged, blue is negatively charged. The isosurface value was set as  $0.003 \text{ e}/\text{\AA}^{-3}$ .

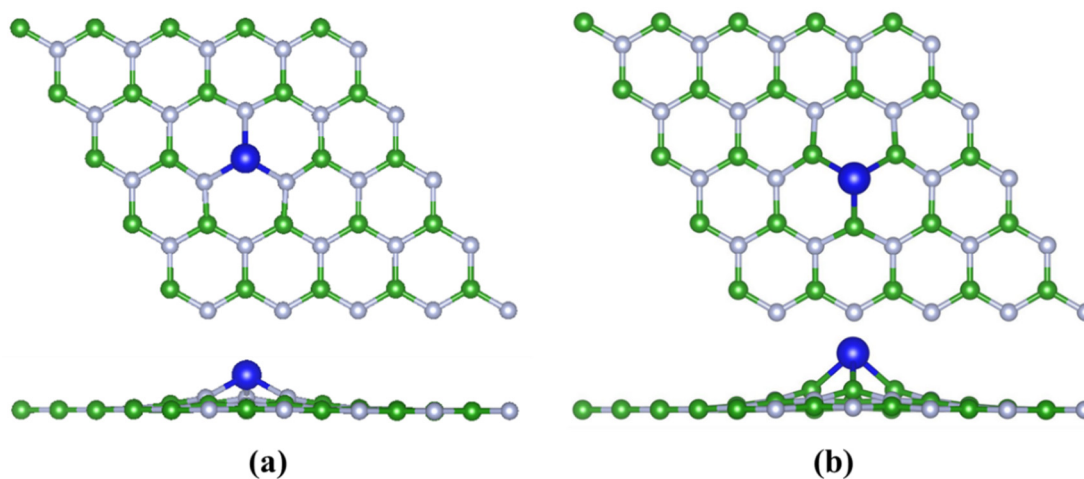

**Figure S6.** Structural diagram of the (a) M@vb-BN and (b) M@vn-BN model. Colour scheme: B, green; N, silver; M, blue.

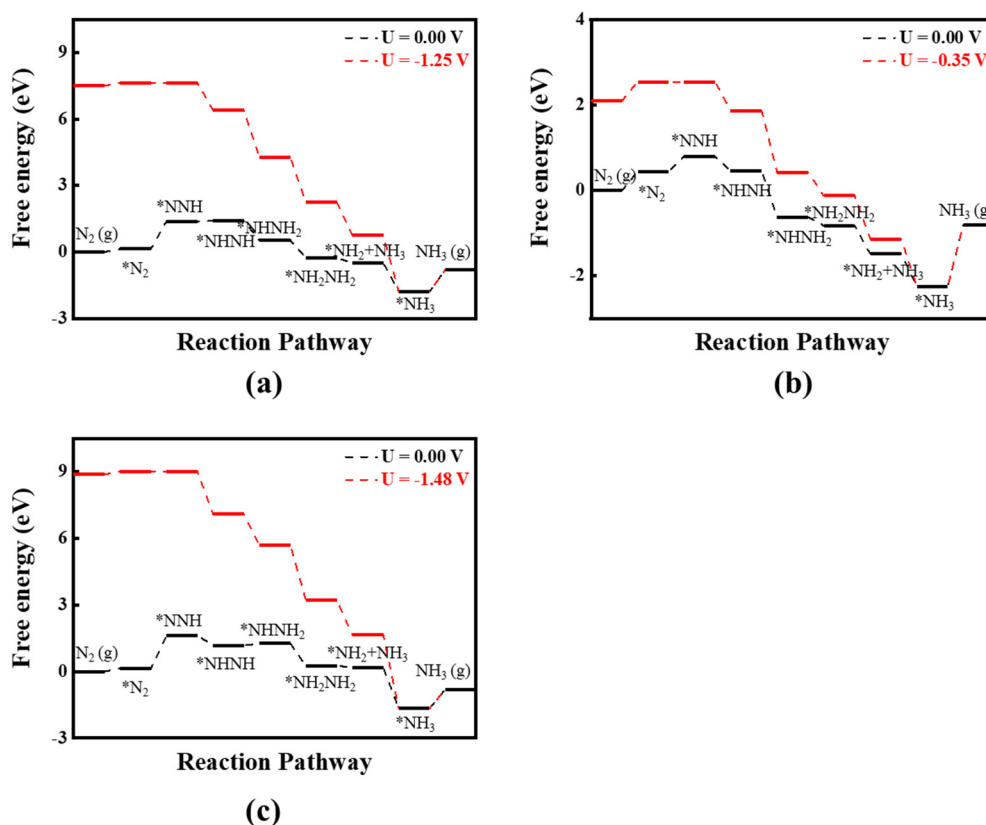

**Figure S7.** Free energy diagram of NRR on (a) Rh@vb-BN, (b) Pt@vb-BN and (c) Rh@vn-BN catalyst at zero and applied potential (limiting potential) through the enzymatic mechanism.



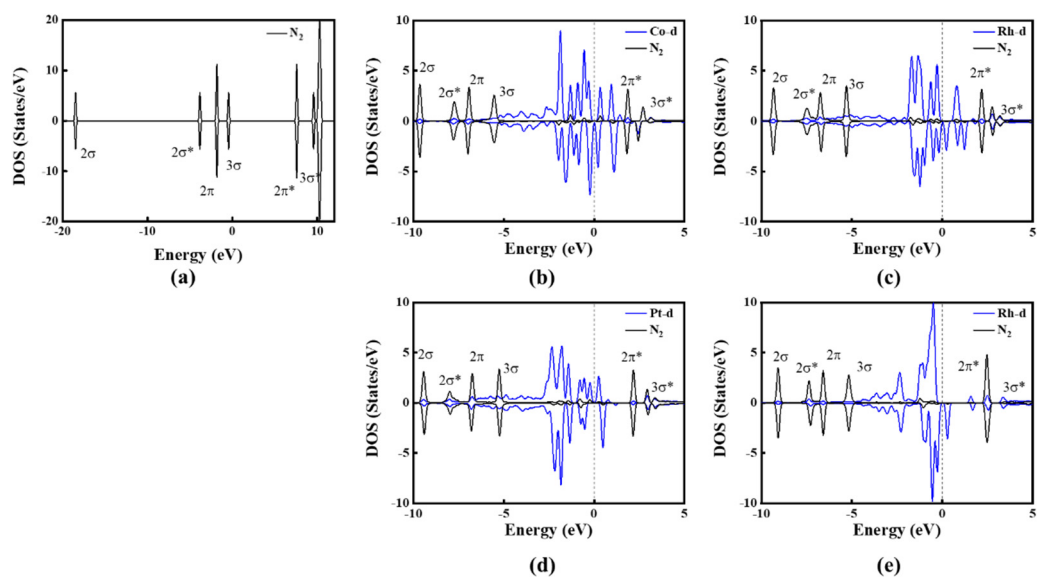

**Figure S8.** (a) Molecular orbitals of free N<sub>2</sub>. The projected density of states (PDOS) of (b) Co<sub>2</sub>  $\perp$  vb-BN, (c) Rh<sub>2</sub>  $\perp$  vb-BN, (d) Pt<sub>2</sub>  $\perp$  vb-BN and (e) Rh<sub>2</sub>  $\perp$  vn-BN.

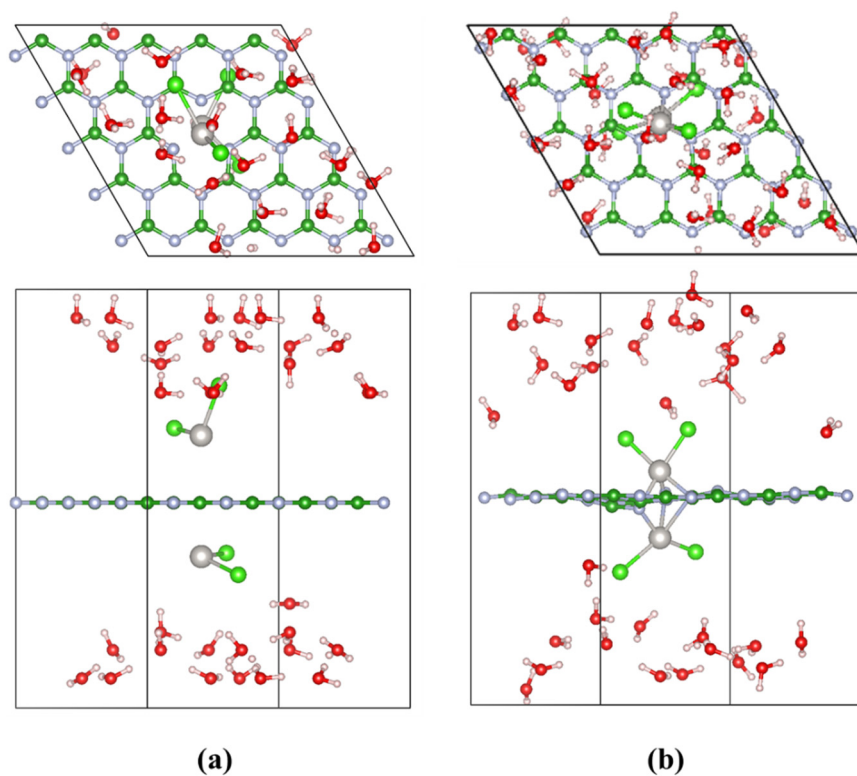

**Figure S9.** Top and side views of the snapshots of atomic configurations of FAMD simulations for the synthetic process of Pt<sub>2</sub>  $\perp$  vb-BN (a,b). The model consists of a 5 $\times$ 5 $\times$ 1 supercell of BN with a boron vacancy, two PtCl<sub>2</sub> molecules and 34 water molecules. Pt, N, B, H, O and Cl are indicated by gray, silver, dark green, white, red and light green, respectively.
